# Supplementary material for: Somno-Art Software identifies pathology-induced changes in sleep parameters similarly to polysomnography
Source: PubMed Central journal article supplement (PMC10588897; doi:10.1371/journal.pone.0291593), 2023-10-20
Supplement: pone.0291593.s002.pdf [file pone.0291593.s002.pdf]

| Patho | Subj | PSG_ TST | SA_ TST | PSG_ SL | SA_ SL | PSG_ WASO | SA_ WASO | PSG_ SE | SA_ SE | PSG_ REML | SA_ REML | PSG_ N1N2 | SA_ N1N2 | PSG_ N3 | SA_ N3 | PSG_ REM | SA_ REM | PSG_ NREM | SA_ NREM |
|-------|------|----------|---------|---------|--------|-----------|----------|---------|--------|-----------|----------|-----------|----------|---------|--------|----------|---------|-----------|----------|
| INS   | 1    | 279.17   | 266.83  | 51.33   | 55.33  | 58.00     | 66.33    | 71.86   | 68.68  | 126.67    | 84.00    | 133.50    | 115.50   | 88.67   | 81.33  | 57.00    | 70.00   | 222.17    | 196.83   |
| INS   | 2    | 198.00   | 199.25  | 95.25   | 95.00  | 95.25     | 94.25    | 50.97   | 51.29  | 57.25     | 134.25   | 109.00    | 124.25   | 63.75   | 53.50  | 25.25    | 21.50   | 172.75    | 177.75   |
| INS   | 3    | 174.33   | 259.67  | 36.67   | 53.17  | 177.50    | 75.67    | 44.87   | 66.84  | NaN       | 196.33   | 123.83    | 175.83   | 33.17   | 43.33  | 17.33    | 40.50   | 157.00    | 219.17   |
| INS   | 4    | 221.83   | 221.83  | 74.17   | 78.17  | 92.50     | 88.50    | 57.10   | 57.10  | 42.83     | 81.33    | 177.17    | 138.50   | 6.50    | 44.67  | 38.17    | 38.67   | 183.67    | 183.17   |
| INS   | 5    | 255.25   | 277.50  | 61.25   | 18.50  | 72.00     | 92.50    | 65.70   | 71.43  | NaN       | 54.00    | 197.50    | 200.50   | 36.25   | 48.50  | 21.50    | 28.50   | 233.75    | 249.00   |
| INS   | 6    | 210.25   | 248.25  | 81.00   | 79.50  | 97.25     | 60.75    | 54.12   | 63.90  | 76.00     | 78.25    | 105.50    | 180.00   | 72.75   | 34.50  | 32.00    | 33.75   | 178.25    | 214.50   |
| INS   | 7    | 209.00   | 190.25  | 94.50   | 109.75 | 85.00     | 88.50    | 53.80   | 48.97  | 143.50    | 214.25   | 132.50    | 109.00   | 37.25   | 64.00  | 39.25    | 17.25   | 169.75    | 173.00   |
| INS   | 8    | 333.50   | 327.50  | 26.00   | 25.50  | 29.00     | 35.50    | 85.84   | 84.30  | 63.75     | 72.75    | 219.00    | 186.75   | 44.25   | 45.00  | 70.25    | 95.75   | 263.25    | 231.75   |
| INS   | 9    | 250.00   | 302.00  | 77.25   | 36.50  | 61.25     | 50.00    | 64.35   | 77.73  | 16.25     | 57.00    | 125.00    | 153.25   | 48.75   | 82.50  | 76.25    | 66.25   | 173.75    | 235.75   |
| INS   | 10   | 248.00   | 224.00  | 118.00  | 121.00 | 22.50     | 43.50    | 63.84   | 57.66  | 98.00     | 90.00    | 130.00    | 103.50   | 53.00   | 54.50  | 65.00    | 66.00   | 183.00    | 158.00   |
| INS   | 11   | 262.83   | 254.67  | 53.17   | 67.33  | 72.50     | 66.50    | 67.65   | 65.55  | 81.83     | 69.50    | 173.50    | 142.83   | 27.00   | 55.33  | 62.33    | 56.50   | 200.50    | 198.17   |
| INS   | 12   | 274.00   | 295.00  | 30.50   | 26.50  | 84.00     | 67.00    | 70.53   | 75.93  | 87.25     | 126.25   | 169.50    | 205.75   | 56.75   | 43.00  | 47.75    | 46.25   | 226.25    | 248.75   |
| INS   | 13   | 345.00   | 346.50  | 10.00   | 6.50   | 33.50     | 35.50    | 88.80   | 89.19  | 57.50     | 56.50    | 147.00    | 175.50   | 130.00  | 93.00  | 68.00    | 78.00   | 277.00    | 268.50   |
| INS   | 14   | 299.25   | 326.00  | 21.00   | 10.50  | 68.25     | 52.00    | 77.03   | 83.91  | 181.25    | 92.50    | 143.50    | 132.50   | 107.75  | 123.75 | 48.00    | 69.75   | 251.25    | 256.25   |
| INS   | 15   | 360.00   | 352.25  | 19.25   | 20.00  | 9.25      | 16.25    | 92.66   | 90.67  | 51.00     | 50.75    | 169.50    | 196.00   | 114.25  | 83.50  | 76.25    | 72.75   | 283.75    | 279.50   |
| INS   | 16   | 214.75   | 301.75  | 119.75  | 74.50  | 54.00     | 12.25    | 55.28   | 77.67  | 53.00     | 63.75    | 79.75     | 234.50   | 75.00   | 20.50  | 60.00    | 46.75   | 154.75    | 255.00   |
| INS   | 17   | 362.50   | 344.00  | 10.50   | 21.50  | 15.50     | 23.00    | 93.31   | 88.55  | 83.50     | 59.00    | 144.50    | 151.00   | 123.25  | 109.25 | 94.75    | 83.75   | 267.75    | 260.25   |
| INS   | 18   | 337.00   | 285.00  | 35.00   | 52.50  | 16.50     | 51.00    | 86.74   | 73.36  | 64.50     | 50.50    | 183.00    | 174.00   | 82.00   | 45.00  | 72.00    | 66.00   | 265.00    | 219.00   |
| INS   | 19   | 331.50   | 290.00  | 37.00   | 42.50  | 20.00     | 56.00    | 85.33   | 74.65  | 131.50    | 125.00   | 145.50    | 123.00   | 124.00  | 114.50 | 62.00    | 52.50   | 269.50    | 237.50   |
| INS   | 20   | 294.50   | 253.67  | 43.83   | 48.33  | 50.17     | 86.50    | 75.80   | 65.29  | 93.67     | 89.17    | 118.00    | 137.33   | 123.83  | 60.33  | 52.67    | 56.00   | 241.83    | 197.67   |
| INS   | 21   | 358.00   | 329.00  | 7.00    | 6.50   | 23.50     | 53.00    | 92.15   | 84.68  | 135.00    | 132.50   | 273.50    | 214.00   | 26.00   | 58.50  | 58.50    | 56.50   | 299.50    | 272.50   |
| INS   | 22   | 352.00   | 364.50  | 17.00   | 14.50  | 19.50     | 9.50     | 90.60   | 93.82  | 13.00     | 116.00   | 186.00    | 197.50   | 89.00   | 87.00  | 77.00    | 80.00   | 275.00    | 284.50   |
| INS   | 23   | 353.00   | 350.50  | 15.00   | 24.50  | 20.50     | 13.50    | 90.86   | 90.22  | 11.50     | 74.00    | 216.00    | 251.00   | 36.00   | 50.50  | 101.00   | 49.00   | 252.00    | 301.50   |
| INS   | 24   | 353.00   | 347.00  | 10.75   | 11.25  | 24.75     | 30.25    | 90.86   | 89.32  | 76.50     | 73.50    | 197.25    | 164.25   | 62.75   | 72.25  | 93.00    | 110.50  | 260.00    | 236.50   |
| INS   | 25   | 330.00   | 305.75  | 20.25   | 39.00  | 38.25     | 43.75    | 84.94   | 78.70  | 57.50     | 80.00    | 121.00    | 171.25   | 136.75  | 65.50  | 72.25    | 69.00   | 257.75    | 236.75   |
| INS   | 26   | 324.00   | 301.50  | 14.50   | 15.50  | 50.00     | 71.50    | 83.40   | 77.61  | 58.50     | 49.00    | 158.00    | 204.00   | 123.00  | 51.00  | 43.00    | 46.50   | 281.00    | 255.00   |
| INS   | 27   | 275.50   | 304.25  | 83.00   | 38.75  | 30.00     | 45.50    | 70.91   | 78.31  | 74.75     | 117.75   | 130.75    | 185.75   | 88.25   | 57.00  | 56.50    | 61.50   | 219.00    | 242.75   |
| INS   | 28   | 341.00   | 329.25  | 22.00   | 22.50  | 25.50     | 36.75    | 87.77   | 84.75  | 58.50     | 57.50    | 156.25    | 234.75   | 127.50  | 52.50  | 57.25    | 42.00   | 283.75    | 287.25   |
| INS   | 29   | 355.50   | 321.00  | 7.00    | 6.00   | 26.00     | 61.50    | 91.51   | 82.63  | 117.50    | 155.50   | 212.00    | 184.50   | 68.50   | 103.00 | 75.00    | 33.50   | 280.50    | 287.50   |
| INS   | 30   | 303.75   | 298.75  | 29.00   | 9.25   | 55.75     | 80.50    | 78.19   | 76.90  | 103.25    | 84.75    | 159.50    | 205.25   | 87.50   | 58.75  | 56.75    | 34.75   | 247.00    | 264.00   |
| INS   | 31   | 182.67   | 249.50  | 182.00  | 45.67  | 23.83     | 93.33    | 47.02   | 64.22  | 58.17     | 195.17   | 77.00     | 131.67   | 60.50   | 77.33  | 45.17    | 40.50   | 137.50    | 209.00   |

|     |    |        |        |        |        |        |        |       |       |        |        |        |        |        |        |       |       |        |        |
|-----|----|--------|--------|--------|--------|--------|--------|-------|-------|--------|--------|--------|--------|--------|--------|-------|-------|--------|--------|
| INS | 32 | 317.25 | 342.50 | 26.25  | 20.25  | 45.00  | 25.75  | 81.66 | 88.16 | 105.50 | 110.75 | 144.50 | 192.75 | 99.75  | 89.50  | 73.00 | 60.25 | 244.25 | 282.25 |
| INS | 33 | 289.67 | 300.33 | 83.83  | 72.67  | 15.00  | 15.50  | 74.56 | 77.31 | 90.83  | 100.50 | 91.00  | 161.17 | 147.83 | 64.50  | 50.83 | 74.67 | 238.83 | 225.67 |
| INS | 34 | 256.75 | 256.75 | 113.50 | 91.50  | 18.25  | 40.25  | 66.09 | 66.09 | 105.25 | 121.25 | 140.00 | 167.50 | 73.75  | 63.25  | 43.00 | 26.00 | 213.75 | 230.75 |
| INS | 35 | 349.00 | 368.00 | 19.50  | 5.00   | 20.00  | 15.50  | 89.83 | 94.72 | 82.50  | 62.00  | 161.50 | 237.00 | 138.50 | 41.00  | 49.00 | 90.00 | 300.00 | 278.00 |
| INS | 36 | 236.50 | 222.50 | 62.50  | 81.33  | 89.50  | 84.67  | 60.88 | 57.27 | 209.17 | 190.50 | 190.33 | 123.00 | 7.67   | 64.67  | 38.50 | 34.83 | 198.00 | 187.67 |
| INS | 37 | 279.00 | 308.00 | 35.50  | 4.00   | 74.00  | 76.50  | 71.81 | 79.28 | 119.50 | 105.50 | 185.00 | 187.50 | 44.50  | 58.50  | 49.50 | 62.00 | 229.50 | 246.00 |
| INS | 38 | 311.50 | 317.67 | 28.50  | 23.17  | 48.50  | 47.67  | 80.18 | 81.77 | 101.50 | 125.33 | 165.67 | 165.00 | 88.67  | 91.00  | 57.17 | 61.67 | 254.33 | 256.00 |
| INS | 39 | 335.00 | 316.50 | 4.00   | 6.50   | 49.50  | 65.50  | 86.23 | 81.47 | 79.50  | 85.00  | 220.50 | 164.00 | 47.50  | 86.50  | 67.00 | 66.00 | 268.00 | 250.50 |
| INS | 40 | 338.75 | 354.00 | 16.75  | 5.75   | 33.00  | 28.75  | 87.19 | 91.12 | 100.25 | 97.00  | 184.75 | 229.50 | 71.00  | 65.00  | 83.00 | 59.50 | 255.75 | 294.50 |
| INS | 41 | 211.50 | 233.83 | 25.00  | 27.50  | 152.00 | 127.17 | 54.44 | 60.19 | NaN    | NaN    | 172.50 | 115.17 | 7.83   | 74.67  | 31.17 | 44.00 | 180.33 | 189.83 |
| INS | 42 | 264.17 | 281.67 | 24.83  | 34.67  | 99.50  | 72.17  | 68.00 | 72.50 | 118.17 | 55.00  | 202.67 | 204.67 | 26.17  | 38.83  | 35.33 | 38.17 | 228.83 | 243.50 |
| INS | 43 | 331.75 | 334.75 | 12.50  | 19.75  | 44.25  | 34.00  | 85.39 | 86.16 | 134.25 | 121.00 | 160.50 | 120.50 | 102.25 | 151.25 | 69.00 | 63.00 | 262.75 | 271.75 |
| INS | 44 | 280.83 | 273.83 | 28.83  | 34.33  | 78.83  | 80.33  | 72.29 | 70.48 | 70.33  | 63.83  | 147.83 | 115.67 | 62.83  | 78.33  | 70.17 | 79.83 | 210.67 | 194.00 |
| INS | 45 | 208.50 | 278.50 | 83.83  | 66.50  | 96.17  | 43.50  | 53.67 | 71.69 | 73.83  | 78.83  | 128.50 | 146.50 | 38.83  | 69.17  | 41.17 | 62.83 | 167.33 | 215.67 |
| INS | 46 | 378.00 | 366.00 | 6.50   | 5.00   | 4.00   | 17.50  | 97.30 | 94.21 | 65.50  | 144.00 | 197.50 | 172.50 | 88.50  | 133.00 | 92.00 | 60.50 | 286.00 | 305.50 |
| INS | 47 | 341.25 | 345.75 | 19.50  | 16.75  | 27.75  | 26.00  | 87.84 | 89.00 | 57.25  | 130.75 | 213.75 | 200.00 | 64.25  | 79.75  | 63.25 | 66.00 | 278.00 | 279.75 |
| INS | 48 | 291.50 | 321.50 | 34.25  | 33.75  | 62.75  | 33.25  | 75.03 | 82.75 | 119.50 | 57.50  | 196.00 | 164.75 | 55.25  | 87.75  | 40.25 | 69.00 | 251.25 | 252.50 |
| INS | 49 | 327.00 | 345.50 | 13.75  | 11.00  | 47.75  | 32.00  | 84.17 | 88.93 | 59.00  | 73.25  | 238.00 | 264.50 | 4.25   | 38.00  | 84.75 | 43.00 | 242.25 | 302.50 |
| INS | 50 | 319.00 | 350.50 | 14.00  | 8.00   | 55.50  | 30.00  | 82.11 | 90.22 | 114.00 | 53.50  | 165.00 | 227.50 | 94.50  | 82.50  | 59.50 | 40.50 | 259.50 | 310.00 |
| INS | 51 | 256.00 | 282.17 | 51.83  | 37.17  | 80.67  | 69.17  | 65.89 | 72.63 | 148.00 | 156.00 | 173.83 | 210.00 | 27.17  | 21.83  | 55.00 | 50.33 | 201.00 | 231.83 |
| INS | 52 | 328.00 | 317.50 | 15.50  | 15.00  | 45.00  | 56.00  | 84.43 | 81.72 | 59.50  | 62.00  | 226.00 | 207.50 | 35.00  | 31.50  | 67.00 | 78.50 | 261.00 | 239.00 |
| INS | 53 | 287.75 | 351.75 | 13.00  | 12.75  | 87.75  | 24.00  | 74.07 | 90.54 | 216.50 | 73.00  | 157.25 | 198.25 | 107.25 | 86.75  | 23.25 | 66.75 | 264.50 | 285.00 |
| INS | 54 | 363.00 | 349.50 | 9.50   | 18.50  | 16.00  | 20.50  | 93.44 | 89.96 | 177.00 | 77.00  | 142.50 | 169.00 | 158.00 | 110.50 | 62.50 | 70.00 | 300.50 | 279.50 |
| INS | 55 | 274.25 | 268.25 | 68.75  | 69.00  | 45.50  | 51.25  | 70.59 | 69.05 | 95.25  | 97.00  | 145.00 | 118.25 | 46.00  | 88.25  | 83.25 | 61.75 | 191.00 | 206.50 |
| INS | 56 | 218.50 | 241.75 | 105.25 | 106.00 | 64.75  | 40.75  | 56.24 | 62.23 | 82.00  | 84.50  | 102.00 | 115.25 | 92.75  | 100.00 | 23.75 | 26.50 | 194.75 | 215.25 |
| INS | 57 | 195.00 | 198.75 | 102.75 | 72.75  | 90.75  | 117.00 | 50.19 | 51.16 | 49.75  | 197.75 | 109.75 | 141.50 | 40.75  | 25.75  | 44.50 | 31.50 | 150.50 | 167.25 |
| INS | 58 | 209.83 | 205.33 | 61.00  | 68.33  | 117.67 | 114.83 | 54.01 | 52.85 | 114.50 | 58.50  | 110.83 | 106.17 | 46.00  | 48.50  | 53.00 | 50.67 | 156.83 | 154.67 |
| INS | 59 | 202.83 | 198.50 | 78.50  | 89.50  | 107.17 | 100.50 | 52.21 | 51.09 | 75.33  | 61.67  | 112.00 | 108.83 | 61.33  | 60.17  | 29.50 | 29.50 | 173.33 | 169.00 |
| INS | 60 | 341.17 | 341.17 | 23.00  | 21.17  | 24.33  | 26.17  | 87.82 | 87.82 | 99.00  | 78.00  | 214.83 | 193.17 | 64.17  | 76.00  | 62.17 | 72.00 | 279.00 | 269.17 |
| INS | 61 | 260.67 | 267.33 | 105.00 | 84.00  | 22.83  | 37.17  | 67.10 | 68.81 | 141.00 | 82.00  | 109.17 | 110.00 | 117.67 | 107.50 | 33.83 | 49.83 | 226.83 | 217.50 |
| INS | 62 | 284.67 | 278.00 | 47.83  | 68.00  | 56.00  | 42.50  | 73.27 | 71.56 | 95.33  | 74.50  | 200.33 | 151.67 | 43.50  | 76.00  | 40.83 | 50.33 | 243.83 | 227.67 |
| INS | 63 | 202.50 | 225.50 | 98.00  | 91.00  | 88.00  | 72.00  | 52.12 | 58.04 | 84.50  | 86.00  | 120.00 | 111.50 | 52.50  | 71.50  | 30.00 | 42.50 | 172.50 | 183.00 |
| INS | 64 | 229.50 | 238.25 | 71.25  | 72.00  | 87.75  | 78.25  | 59.07 | 61.33 | 96.25  | 69.25  | 109.75 | 117.50 | 86.75  | 59.25  | 33.00 | 61.50 | 196.50 | 176.75 |

|     |    |        |        |       |        |        |        |       |       |        |        |        |        |        |        |       |        |        |        |
|-----|----|--------|--------|-------|--------|--------|--------|-------|-------|--------|--------|--------|--------|--------|--------|-------|--------|--------|--------|
| INS | 65 | 269.00 | 264.17 | 63.17 | 69.33  | 56.33  | 55.00  | 69.24 | 68.00 | 82.83  | 67.00  | 131.83 | 137.83 | 64.17  | 66.17  | 73.00 | 60.17  | 196.00 | 204.00 |
| INS | 66 | 318.00 | 269.00 | 21.50 | 30.75  | 49.00  | 88.75  | 81.85 | 69.24 | 154.75 | 156.75 | 240.75 | 178.50 | 40.75  | 58.50  | 36.50 | 32.00  | 281.50 | 237.00 |
| MDD | 1  | 367.25 | 343.75 | 14.75 | 15.25  | 6.50   | 29.50  | 94.53 | 88.48 | 57.50  | 56.75  | 189.50 | 170.50 | 96.75  | 92.50  | 81.00 | 80.75  | 286.25 | 263.00 |
| MDD | 2  | 355.00 | 319.50 | 19.50 | 35.25  | 14.00  | 33.75  | 91.38 | 82.24 | 60.50  | 41.50  | 163.75 | 192.25 | 133.25 | 71.75  | 58.00 | 55.50  | 297.00 | 264.00 |
| MDD | 3  | 333.75 | 323.00 | 34.50 | 35.75  | 20.25  | 29.75  | 85.91 | 83.14 | 78.75  | 75.25  | 183.75 | 180.25 | 77.25  | 73.25  | 72.75 | 69.50  | 261.00 | 253.50 |
| MDD | 4  | 304.00 | 274.25 | 31.00 | 67.00  | 53.50  | 47.25  | 78.25 | 70.59 | 140.25 | 46.50  | 158.00 | 151.50 | 111.75 | 66.50  | 34.25 | 56.25  | 269.75 | 218.00 |
| MDD | 5  | 375.00 | 347.00 | 8.00  | 8.50   | 5.50   | 33.00  | 96.53 | 89.32 | 44.00  | 40.50  | 168.00 | 195.00 | 130.00 | 46.50  | 77.00 | 105.50 | 298.00 | 241.50 |
| MDD | 6  | 313.00 | 313.25 | 33.75 | 35.00  | 41.75  | 40.25  | 80.57 | 80.63 | 171.75 | 169.25 | 180.75 | 151.50 | 94.75  | 126.25 | 37.50 | 35.50  | 275.50 | 277.75 |
| MDD | 7  | 352.25 | 347.50 | 21.75 | 24.25  | 14.50  | 16.75  | 90.67 | 89.45 | 76.75  | 125.50 | 129.75 | 179.75 | 150.75 | 90.50  | 71.75 | 77.25  | 280.50 | 270.25 |
| MDD | 8  | 291.25 | 352.75 | 16.75 | 5.50   | 80.50  | 30.25  | 74.97 | 90.80 | 134.00 | 90.75  | 165.50 | 225.25 | 82.00  | 69.25  | 43.75 | 58.25  | 247.50 | 294.50 |
| MDD | 9  | 351.00 | 328.00 | 10.50 | 29.50  | 27.00  | 31.00  | 90.35 | 84.43 | 16.50  | 99.50  | 173.00 | 255.50 | 124.00 | 29.50  | 54.00 | 43.00  | 297.00 | 285.00 |
| MDD | 10 | 250.50 | 298.25 | 87.75 | 23.50  | 50.25  | 66.75  | 64.48 | 76.77 | 116.00 | 118.00 | 157.25 | 187.00 | 14.75  | 46.75  | 78.50 | 64.50  | 172.00 | 233.75 |
| MDD | 11 | 310.75 | 297.25 | 50.25 | 25.25  | 27.50  | 66.00  | 79.99 | 76.51 | 96.50  | 89.00  | 117.00 | 201.00 | 131.75 | 42.00  | 62.00 | 54.25  | 248.75 | 243.00 |
| MDD | 12 | 340.00 | 301.50 | 24.25 | 23.50  | 24.25  | 63.50  | 87.52 | 77.61 | 213.50 | 175.25 | 181.50 | 151.25 | 118.25 | 113.25 | 40.25 | 37.00  | 299.75 | 264.50 |
| MDD | 13 | 304.50 | 303.50 | 24.00 | 2.00   | 60.00  | 83.00  | 78.38 | 78.12 | 139.00 | 169.00 | 220.00 | 182.00 | 39.50  | 64.50  | 45.00 | 57.00  | 259.50 | 246.50 |
| MDD | 14 | 314.50 | 347.00 | 20.00 | 12.75  | 54.00  | 28.75  | 80.95 | 89.32 | 209.00 | 146.25 | 229.50 | 222.75 | 58.25  | 48.00  | 26.75 | 76.25  | 287.75 | 270.75 |
| MDD | 15 | 1.25   | 1.75   | NaN   | NaN    | NaN    | NaN    | 0.32  | 0.45  | NaN    | NaN    | 1.25   | 1.75   | 0.00   | 0.00   | 0.00  | 0.00   | 1.25   | 1.75   |
| MDD | 16 | 346.50 | 276.00 | 18.00 | 50.50  | 24.00  | 62.00  | 89.19 | 71.04 | 150.50 | 114.00 | 95.00  | 163.50 | 196.00 | 60.00  | 55.50 | 52.50  | 291.00 | 223.50 |
| MDD | 17 | 331.25 | 330.00 | 12.00 | 8.50   | 45.25  | 50.00  | 85.26 | 84.94 | 113.25 | 114.25 | 210.75 | 178.00 | 41.75  | 69.25  | 78.75 | 82.75  | 252.50 | 247.25 |
| MDD | 18 | 342.25 | 342.00 | 8.25  | 33.00  | 38.00  | 13.50  | 88.10 | 88.03 | 232.50 | 85.50  | 165.50 | 189.25 | 121.00 | 107.00 | 55.75 | 45.75  | 286.50 | 296.25 |
| MDD | 19 | 340.00 | 338.00 | 16.00 | 13.50  | 32.50  | 37.00  | 87.52 | 87.00 | 63.50  | 65.00  | 202.00 | 197.50 | 66.50  | 73.50  | 71.50 | 67.00  | 268.50 | 271.00 |
| MDD | 20 | 186.00 | 170.75 | 91.50 | 97.50  | 111.00 | 120.25 | 47.88 | 43.95 | 182.00 | 173.00 | 79.00  | 66.50  | 45.50  | 59.50  | 61.50 | 44.75  | 124.50 | 126.00 |
| MDD | 21 | 358.75 | 321.00 | 2.00  | 4.25   | 27.75  | 63.25  | 92.34 | 82.63 | 69.50  | 66.00  | 209.25 | 162.75 | 53.75  | 54.00  | 95.75 | 104.25 | 263.00 | 216.75 |
| MDD | 22 | 306.25 | 267.75 | 21.75 | 104.50 | 60.50  | 16.25  | 78.83 | 68.92 | 153.00 | 69.75  | 163.00 | 139.00 | 88.50  | 74.00  | 54.75 | 54.75  | 251.50 | 213.00 |
| MDD | 23 | 324.00 | 327.00 | 48.00 | 46.00  | 16.50  | 15.50  | 83.40 | 84.17 | 235.00 | 238.50 | 160.50 | 179.00 | 124.50 | 110.50 | 39.00 | 37.50  | 285.00 | 289.50 |
| MDD | 24 | 368.50 | 334.50 | 4.75  | 29.75  | 15.25  | 24.25  | 94.85 | 86.10 | 122.25 | 85.25  | 235.50 | 207.75 | 79.75  | 71.25  | 53.25 | 55.50  | 315.25 | 279.00 |
| MDD | 25 | 332.75 | 334.75 | 20.25 | 22.75  | 35.50  | 31.00  | 85.65 | 86.16 | 120.50 | 77.25  | 193.25 | 149.75 | 88.00  | 125.00 | 51.50 | 60.00  | 281.25 | 274.75 |
| MDD | 26 | 288.00 | 278.75 | 69.75 | 88.75  | 30.75  | 21.00  | 74.13 | 71.75 | 145.25 | 48.75  | 136.75 | 184.25 | 103.50 | 39.75  | 47.75 | 54.75  | 240.25 | 224.00 |
| MDD | 27 | 292.50 | 361.25 | 13.00 | 19.50  | 83.00  | 7.75   | 75.29 | 92.99 | 85.25  | 83.50  | 225.75 | 230.00 | 30.50  | 88.75  | 36.25 | 42.50  | 256.25 | 318.75 |
| MDD | 28 | 355.00 | 276.50 | 2.50  | 82.00  | 31.00  | 30.00  | 91.38 | 71.17 | 145.50 | 63.50  | 141.00 | 166.50 | 183.50 | 67.50  | 30.50 | 42.50  | 324.50 | 234.00 |
| MDD | 29 | 284.25 | 317.25 | 12.75 | 9.00   | 91.50  | 62.25  | 73.17 | 81.66 | 167.25 | 133.25 | 143.25 | 160.25 | 82.75  | 94.75  | 58.25 | 62.25  | 226.00 | 255.00 |
| MDD | 30 | 306.25 | 311.25 | 49.50 | 53.25  | 32.75  | 24.00  | 78.83 | 80.12 | 97.50  | 92.25  | 194.50 | 182.00 | 48.25  | 67.50  | 63.50 | 61.75  | 242.75 | 249.50 |
| MDD | 31 | 290.50 | 344.50 | 59.75 | 25.50  | 38.25  | 18.50  | 74.77 | 88.67 | 122.50 | 63.25  | 189.25 | 187.00 | 45.75  | 64.75  | 55.50 | 92.75  | 235.00 | 251.75 |

|     |    |        |        |        |        |        |        |       |       |        |        |        |        |        |        |       |       |        |        |
|-----|----|--------|--------|--------|--------|--------|--------|-------|-------|--------|--------|--------|--------|--------|--------|-------|-------|--------|--------|
| MDD | 32 | 290.25 | 317.50 | 51.50  | 30.75  | 46.75  | 40.25  | 74.71 | 81.72 | 84.50  | 100.25 | 128.25 | 147.00 | 106.25 | 103.75 | 55.75 | 66.75 | 234.50 | 250.75 |
| MDD | 33 | 342.00 | 321.00 | 21.50  | 16.75  | 25.00  | 50.75  | 88.03 | 82.63 | 133.50 | 101.00 | 203.50 | 174.00 | 73.25  | 76.50  | 65.25 | 70.50 | 276.75 | 250.50 |
| MDD | 34 | 330.00 | 325.00 | 28.25  | 47.00  | 30.25  | 16.50  | 84.94 | 83.66 | 132.00 | 108.00 | 201.75 | 179.00 | 84.75  | 86.25  | 43.50 | 59.75 | 286.50 | 265.25 |
| MDD | 35 | 303.25 | 284.00 | 38.25  | 87.75  | 47.00  | 16.75  | 78.06 | 73.10 | 124.75 | 77.25  | 181.00 | 158.75 | 61.50  | 78.50  | 60.75 | 46.75 | 242.50 | 237.25 |
| MDD | 36 | 308.50 | 326.00 | 36.25  | 31.00  | 43.75  | 31.50  | 79.41 | 83.91 | 154.75 | 91.00  | 203.00 | 163.75 | 57.00  | 82.75  | 48.50 | 79.50 | 260.00 | 246.50 |
| MDD | 37 | 326.25 | 337.75 | 41.50  | 20.50  | 20.75  | 30.25  | 83.98 | 86.94 | 67.50  | 89.00  | 172.25 | 173.25 | 87.75  | 97.50  | 66.25 | 67.00 | 260.00 | 270.75 |
| MDD | 38 | 178.50 | 232.00 | 117.00 | 109.00 | 93.00  | 47.50  | 45.95 | 59.72 | 172.00 | 54.00  | 125.50 | 142.00 | 35.00  | 50.50  | 18.00 | 39.50 | 160.50 | 192.50 |
| MDD | 39 | 349.50 | 363.50 | 14.75  | 1.50   | 24.25  | 23.50  | 89.96 | 93.56 | 54.00  | 66.50  | 188.00 | 159.75 | 93.50  | 121.50 | 68.00 | 82.25 | 281.50 | 281.25 |
| MDD | 40 | 334.25 | 337.00 | 44.25  | 20.50  | 10.00  | 31.00  | 86.04 | 86.74 | 78.00  | 101.00 | 167.75 | 205.00 | 102.00 | 57.00  | 64.50 | 75.00 | 269.75 | 262.00 |
| MDD | 41 | 316.75 | 316.75 | 49.25  | 50.75  | 22.50  | 21.00  | 81.53 | 81.53 | 36.00  | 63.50  | 116.50 | 151.75 | 125.50 | 93.75  | 74.75 | 71.25 | 242.00 | 245.50 |
| MDD | 42 | 235.25 | 253.50 | 75.25  | 31.50  | 78.00  | 103.50 | 60.55 | 65.25 | 68.25  | 173.50 | 96.00  | 142.25 | 79.25  | 46.25  | 60.00 | 65.00 | 175.25 | 188.50 |
| MDD | 43 | 333.50 | 351.00 | 5.00   | 0.50   | 50.00  | 37.00  | 85.84 | 90.35 | 185.00 | 192.50 | 241.00 | 187.00 | 56.50  | 117.50 | 36.00 | 46.50 | 297.50 | 304.50 |
| MDD | 44 | 208.00 | 293.75 | 37.75  | 35.25  | 142.75 | 59.50  | 53.54 | 75.61 | NaN    | 120.25 | 138.25 | 190.75 | 63.25  | 72.50  | 6.50  | 30.50 | 201.50 | 263.25 |
| MDD | 45 | 185.25 | 278.25 | 95.00  | 16.75  | 108.25 | 93.50  | 47.68 | 71.62 | 81.75  | 119.25 | 150.25 | 192.75 | 3.00   | 40.50  | 32.00 | 45.00 | 153.25 | 233.25 |
| MDD | 46 | 265.00 | 272.00 | 43.25  | 31.75  | 80.25  | 84.75  | 68.21 | 70.01 | 190.25 | 244.75 | 168.75 | 215.50 | 50.50  | 28.75  | 45.75 | 27.75 | 219.25 | 244.25 |
| MDD | 47 | 305.00 | 320.25 | 41.00  | 34.00  | 42.50  | 34.25  | 78.51 | 82.43 | 76.50  | 60.50  | 165.75 | 184.50 | 89.50  | 59.00  | 49.75 | 76.75 | 255.25 | 243.50 |
| MDD | 48 | 282.25 | 299.50 | 48.00  | 44.00  | 58.25  | 45.00  | 72.65 | 77.09 | 37.25  | 107.00 | 166.75 | 156.00 | 63.75  | 88.50  | 51.75 | 55.00 | 230.50 | 244.50 |
| MDD | 49 | 297.25 | 232.00 | 44.25  | 101.25 | 47.00  | 55.25  | 76.51 | 59.72 | 125.75 | 69.00  | 122.75 | 91.50  | 98.00  | 76.50  | 76.50 | 64.00 | 220.75 | 168.00 |
| MDD | 50 | 268.25 | 294.75 | 21.75  | 31.25  | 98.50  | 62.50  | 69.05 | 75.87 | 122.50 | 155.50 | 166.25 | 189.00 | 43.50  | 60.25  | 58.50 | 45.50 | 209.75 | 249.25 |
| MDD | 51 | 333.00 | 325.75 | 46.25  | 50.25  | 9.25   | 12.50  | 85.71 | 83.85 | 66.50  | 57.00  | 162.25 | 160.25 | 115.25 | 94.75  | 55.50 | 70.75 | 277.50 | 255.00 |
| MDD | 52 | 287.75 | 306.00 | 27.00  | 44.75  | 73.75  | 37.75  | 74.07 | 78.76 | 147.75 | 121.50 | 173.25 | 211.50 | 95.25  | 61.00  | 19.25 | 33.50 | 268.50 | 272.50 |
| MDD | 53 | 309.75 | 321.75 | 13.75  | 19.50  | 65.00  | 47.25  | 79.73 | 82.82 | 162.00 | 112.75 | 162.25 | 206.00 | 94.00  | 76.75  | 53.50 | 39.00 | 256.25 | 282.75 |
| MDD | 54 | 198.50 | 250.00 | 73.25  | 24.25  | 116.75 | 114.25 | 51.09 | 64.35 | NaN    | 194.50 | 140.75 | 165.75 | 30.00  | 41.00  | 27.75 | 43.25 | 170.75 | 206.75 |
| MDD | 55 | 290.50 | 238.50 | 19.00  | 25.00  | 79.00  | 125.00 | 74.77 | 61.39 | 73.50  | 126.50 | 201.50 | 149.00 | 31.50  | 37.00  | 57.50 | 52.50 | 233.00 | 186.00 |
| MDD | 56 | 288.00 | 329.50 | 16.75  | 9.75   | 83.75  | 49.25  | 74.13 | 84.81 | 77.75  | 52.50  | 191.00 | 218.25 | 44.50  | 41.00  | 52.50 | 70.25 | 235.50 | 259.25 |
| MDD | 57 | 341.50 | 366.75 | 22.00  | 13.00  | 25.00  | 8.75   | 87.90 | 94.40 | 71.75  | 73.25  | 236.25 | 206.00 | 15.75  | 78.25  | 89.50 | 82.50 | 252.00 | 284.25 |
| MDD | 58 | 311.50 | 353.00 | 16.50  | 14.50  | 60.50  | 21.00  | 80.18 | 90.86 | 39.00  | 62.00  | 221.50 | 184.50 | 23.50  | 88.50  | 66.50 | 80.00 | 245.00 | 273.00 |
| MDD | 59 | 285.50 | 350.00 | 30.50  | 5.50   | 72.50  | 33.00  | 73.49 | 90.09 | 90.50  | 45.00  | 187.00 | 259.00 | 50.00  | 23.00  | 48.50 | 68.00 | 237.00 | 282.00 |
| MDD | 60 | 238.00 | 334.00 | 55.75  | 12.25  | 94.75  | 42.25  | 61.26 | 85.97 | 87.75  | 123.25 | 124.00 | 177.75 | 87.50  | 113.00 | 26.50 | 43.25 | 211.50 | 290.75 |
| MDD | 61 | 325.00 | 326.50 | 30.50  | 42.00  | 33.00  | 20.00  | 83.66 | 84.04 | 109.50 | 110.00 | 179.00 | 222.00 | 80.50  | 34.00  | 65.50 | 70.50 | 259.50 | 256.00 |
| MDD | 62 | 339.25 | 354.75 | 19.75  | 13.25  | 29.50  | 20.50  | 87.32 | 91.31 | 82.00  | 63.00  | 190.75 | 204.50 | 72.00  | 83.25  | 76.50 | 67.00 | 262.75 | 287.75 |
| MDD | 63 | 252.50 | 197.50 | 60.50  | 74.50  | 75.50  | 116.50 | 64.99 | 50.84 | 162.25 | 147.00 | 171.25 | 138.25 | 31.50  | 30.75  | 49.75 | 28.50 | 202.75 | 169.00 |
| MDD | 64 | 366.50 | 335.00 | 15.25  | 9.75   | 6.75   | 43.75  | 94.34 | 86.23 | 75.50  | 80.75  | 169.25 | 200.50 | 117.00 | 47.50  | 80.25 | 87.00 | 286.25 | 248.00 |

|     |    |        |        |        |       |        |        |       |       |        |        |        |        |        |        |       |        |        |        |
|-----|----|--------|--------|--------|-------|--------|--------|-------|-------|--------|--------|--------|--------|--------|--------|-------|--------|--------|--------|
| MDD | 65 | 213.50 | 229.00 | 63.50  | 9.00  | 111.50 | 150.50 | 54.95 | 58.94 | 51.50  | 100.50 | 101.00 | 129.50 | 79.50  | 66.00  | 33.00 | 33.50  | 180.50 | 195.50 |
| MDD | 66 | 138.00 | 202.00 | 43.00  | 43.25 | 207.50 | 143.25 | 35.52 | 51.99 | 41.00  | 85.50  | 46.25  | 124.75 | 70.00  | 41.00  | 21.75 | 36.25  | 116.25 | 165.75 |
| MDD | 67 | 327.00 | 375.50 | 35.50  | 2.50  | 26.00  | 10.50  | 84.17 | 96.65 | 192.50 | 123.00 | 206.00 | 223.00 | 83.00  | 75.00  | 38.00 | 77.50  | 289.00 | 298.00 |
| MDD | 68 | 308.50 | 325.50 | 20.00  | 16.50 | 60.00  | 46.50  | 79.41 | 83.78 | 75.75  | 75.25  | 217.75 | 188.75 | 17.00  | 69.50  | 73.75 | 67.25  | 234.75 | 258.25 |
| MDD | 69 | 251.75 | 323.75 | 56.25  | 7.75  | 80.50  | 57.00  | 64.80 | 83.33 | 84.50  | 95.50  | 182.50 | 211.50 | 27.25  | 50.50  | 42.00 | 61.75  | 209.75 | 262.00 |
| MDD | 70 | 311.50 | 324.75 | 14.75  | 16.75 | 62.25  | 47.00  | 80.18 | 83.59 | 69.00  | 58.50  | 235.50 | 180.50 | 30.50  | 79.00  | 45.50 | 65.25  | 266.00 | 259.50 |
| MDD | 71 | 223.75 | 235.00 | 62.00  | 72.75 | 102.75 | 80.75  | 57.59 | 60.49 | NaN    | 90.00  | 153.25 | 140.50 | 51.50  | 57.25  | 19.00 | 37.25  | 204.75 | 197.75 |
| MDD | 72 | 252.75 | 208.75 | 21.50  | 30.25 | 114.25 | 149.50 | 65.06 | 53.73 | 82.50  | 85.75  | 224.00 | 147.50 | 0.00   | 48.00  | 28.75 | 13.25  | 224.00 | 195.50 |
| MDD | 73 | 340.00 | 288.75 | 27.75  | 24.25 | 20.75  | 75.50  | 87.52 | 74.32 | 107.00 | 89.75  | 218.25 | 179.00 | 65.25  | 29.75  | 56.50 | 80.00  | 283.50 | 208.75 |
| MDD | 74 | 295.25 | 332.25 | 2.75   | 8.50  | 90.50  | 47.75  | 76.00 | 85.52 | 71.50  | 66.75  | 231.25 | 232.50 | 12.25  | 23.25  | 51.75 | 76.50  | 243.50 | 255.75 |
| MDD | 75 | 358.00 | 328.00 | 11.75  | 8.25  | 18.75  | 52.25  | 92.15 | 84.43 | 115.50 | 127.50 | 221.50 | 168.75 | 59.75  | 93.50  | 76.75 | 65.75  | 281.25 | 262.25 |
| MDD | 76 | 315.75 | 348.00 | 12.75  | 5.75  | 60.00  | 34.75  | 81.27 | 89.58 | 59.50  | 65.00  | 206.50 | 218.75 | 62.75  | 79.00  | 46.50 | 50.25  | 269.25 | 297.75 |
| MDD | 77 | 196.50 | 318.50 | 24.50  | 25.50 | 167.50 | 44.50  | 50.58 | 81.98 | 264.00 | 110.50 | 144.50 | 209.50 | 28.50  | 69.00  | 23.50 | 40.00  | 173.00 | 278.50 |
| MDD | 78 | 291.50 | 282.75 | 29.00  | 83.00 | 68.00  | 22.75  | 75.03 | 72.78 | 133.00 | 78.25  | 130.00 | 104.00 | 99.50  | 102.00 | 62.00 | 76.75  | 229.50 | 206.00 |
| MDD | 79 | 241.00 | 252.00 | 56.00  | 50.00 | 91.50  | 86.50  | 62.03 | 64.86 | 70.00  | 77.50  | 140.00 | 140.50 | 52.00  | 59.00  | 49.00 | 52.50  | 192.00 | 199.50 |
| MDD | 80 | 347.00 | 311.75 | 15.00  | 33.00 | 26.50  | 43.75  | 89.32 | 80.24 | 48.00  | 71.75  | 219.00 | 219.00 | 60.50  | 43.25  | 67.50 | 49.50  | 279.50 | 262.25 |
| MDD | 81 | 315.50 | 327.50 | 12.75  | 19.50 | 60.25  | 41.50  | 81.21 | 84.30 | 121.50 | 84.25  | 135.00 | 158.00 | 107.00 | 98.75  | 73.50 | 70.75  | 242.00 | 256.75 |
| MDD | 82 | 311.00 | 358.25 | 38.25  | 8.75  | 39.25  | 21.50  | 80.05 | 92.21 | 57.00  | 86.75  | 170.25 | 199.25 | 77.75  | 88.75  | 63.00 | 70.25  | 248.00 | 288.00 |
| MDD | 83 | 260.00 | 343.50 | 22.50  | 0.50  | 106.00 | 44.50  | 66.92 | 88.42 | NaN    | 343.00 | 166.50 | 277.00 | 93.50  | 40.50  | 0.00  | 26.00  | 260.00 | 317.50 |
| MDD | 84 | 342.75 | 345.25 | 20.50  | 14.25 | 25.25  | 29.00  | 88.22 | 88.87 | 230.50 | 68.00  | 316.50 | 183.00 | 0.25   | 99.50  | 26.00 | 62.75  | 316.75 | 282.50 |
| MDD | 85 | 340.50 | 353.00 | 26.00  | 21.00 | 22.00  | 14.50  | 87.64 | 90.86 | 167.00 | 180.50 | 203.00 | 172.00 | 94.50  | 136.00 | 43.00 | 45.00  | 297.50 | 308.00 |
| MDD | 86 | 349.00 | 364.50 | 26.75  | 15.50 | 12.75  | 8.50   | 89.83 | 93.82 | 163.00 | 50.75  | 276.00 | 195.00 | 5.75   | 48.75  | 67.25 | 120.75 | 281.75 | 243.75 |
| MDD | 87 | 320.00 | 342.50 | 57.50  | 12.50 | 11.00  | 33.50  | 82.37 | 88.16 | 123.00 | 79.50  | 238.50 | 251.50 | 13.50  | 45.00  | 68.00 | 46.00  | 252.00 | 296.50 |
| MDD | 88 | 316.00 | 369.00 | 46.50  | 2.00  | 26.00  | 17.50  | 81.34 | 94.98 | 121.50 | 175.50 | 172.50 | 168.50 | 75.00  | 157.50 | 68.50 | 43.00  | 247.50 | 326.00 |
| MDD | 89 | 171.50 | 319.00 | 102.00 | 5.00  | 115.00 | 64.50  | 44.14 | 82.11 | 151.50 | 243.50 | 164.00 | 216.00 | 0.00   | 70.50  | 7.50  | 32.50  | 164.00 | 286.50 |
| MDD | 90 | 252.25 | 281.75 | 15.00  | 33.25 | 121.25 | 73.50  | 64.93 | 72.52 | 51.50  | 143.50 | 184.25 | 177.25 | 19.75  | 59.75  | 48.25 | 44.75  | 204.00 | 237.00 |
| MDD | 91 | 344.00 | 288.50 | 10.75  | 14.75 | 33.75  | 85.25  | 88.55 | 74.26 | 65.00  | 64.75  | 232.50 | 175.50 | 33.75  | 67.00  | 77.75 | 46.00  | 266.25 | 242.50 |
| MDD | 92 | 371.50 | 361.00 | 8.50   | 10.50 | 8.50   | 17.00  | 95.62 | 92.92 | 80.50  | 160.50 | 187.50 | 193.50 | 113.50 | 126.50 | 70.50 | 41.00  | 301.00 | 320.00 |
| MDD | 93 | 368.50 | 356.50 | 9.25   | 3.25  | 10.75  | 28.75  | 94.85 | 91.76 | 109.50 | 71.50  | 220.75 | 198.50 | 85.50  | 103.50 | 62.25 | 54.50  | 306.25 | 302.00 |
| MDD | 94 | 274.75 | 287.75 | 38.25  | 43.00 | 75.50  | 57.75  | 70.72 | 74.07 | 211.25 | 208.00 | 175.50 | 195.25 | 59.75  | 57.50  | 39.50 | 35.00  | 235.25 | 252.75 |
| MDD | 95 | 197.50 | 302.00 | 172.00 | 16.00 | 19.00  | 70.50  | 50.84 | 77.73 | 19.50  | 172.50 | 140.00 | 205.00 | 1.00   | 42.00  | 56.50 | 55.00  | 141.00 | 247.00 |
| MDD | 96 | 189.00 | 229.25 | 54.00  | 11.00 | 145.50 | 148.25 | 48.65 | 59.01 | 203.25 | 219.25 | 130.75 | 123.75 | 35.75  | 65.00  | 22.50 | 40.50  | 166.50 | 188.75 |
| MDD | 97 | 288.50 | 293.00 | 96.00  | 85.50 | 4.00   | 10.00  | 74.26 | 75.42 | 172.50 | 124.50 | 155.50 | 181.50 | 74.50  | 80.00  | 58.50 | 31.50  | 230.00 | 261.50 |

|        |     |        |        |        |        |        |        |       |       |        |        |        |        |        |        |        |        |        |        |
|--------|-----|--------|--------|--------|--------|--------|--------|-------|-------|--------|--------|--------|--------|--------|--------|--------|--------|--------|--------|
| MDD    | 98  | 351.00 | 334.00 | 29.25  | 42.50  | 8.25   | 12.00  | 90.35 | 85.97 | 62.50  | 48.25  | 160.00 | 162.75 | 97.50  | 92.75  | 93.50  | 78.50  | 257.50 | 255.50 |
| MDD    | 99  | 367.00 | 365.00 | 15.00  | 14.00  | 6.50   | 9.50   | 94.47 | 93.95 | 71.50  | 70.00  | 202.50 | 179.00 | 99.00  | 123.50 | 65.50  | 62.50  | 301.50 | 302.50 |
| MDD    | 100 | 200.00 | 295.50 | 56.00  | 44.00  | 132.50 | 49.00  | 51.48 | 76.06 | 255.00 | 188.00 | 142.50 | 203.00 | 0.50   | 32.50  | 57.00  | 60.00  | 143.00 | 235.50 |
| MDD    | 101 | 154.00 | 70.50  | 208.50 | 316.50 | 26.00  | 1.50   | 39.64 | 18.15 | 122.00 | 37.00  | 87.50  | 36.00  | 19.00  | 7.00   | 47.50  | 27.50  | 106.50 | 43.00  |
| MDD    | 102 | 356.00 | 360.50 | 11.00  | 1.50   | 21.50  | 26.50  | 91.63 | 92.79 | 28.50  | 41.50  | 133.00 | 221.50 | 98.50  | 43.50  | 124.50 | 95.50  | 231.50 | 265.00 |
| MDD    | 103 | 344.50 | 341.50 | 8.00   | 26.00  | 36.00  | 21.00  | 88.67 | 87.90 | 119.00 | 99.50  | 241.50 | 222.50 | 28.50  | 38.00  | 74.50  | 81.00  | 270.00 | 260.50 |
| MDD    | 104 | 369.50 | 360.50 | 15.00  | 12.00  | 4.00   | 16.00  | 95.11 | 92.79 | 145.50 | 147.00 | 259.50 | 208.00 | 55.00  | 94.00  | 55.00  | 58.50  | 314.50 | 302.00 |
| MDD    | 105 | 374.75 | 334.25 | 5.00   | 13.50  | 8.75   | 40.75  | 96.46 | 86.04 | 137.25 | 177.00 | 218.25 | 167.50 | 96.75  | 124.25 | 59.75  | 42.50  | 315.00 | 291.75 |
| MDD    | 106 | 356.00 | 345.50 | 7.00   | 4.00   | 25.50  | 39.00  | 91.63 | 88.93 | 104.00 | 88.00  | 222.50 | 189.00 | 66.00  | 81.50  | 67.50  | 75.00  | 288.50 | 270.50 |
| MDD    | 107 | 273.50 | 257.50 | 75.50  | 107.00 | 39.50  | 24.00  | 70.40 | 66.28 | 91.00  | 59.00  | 168.50 | 118.50 | 79.00  | 88.50  | 26.00  | 50.50  | 247.50 | 207.00 |
| MDD    | 108 | 372.50 | 359.75 | 3.75   | 4.75   | 12.25  | 24.00  | 95.88 | 92.60 | 69.00  | 116.25 | 160.25 | 172.50 | 138.50 | 110.25 | 73.75  | 77.00  | 298.75 | 282.75 |
| MDD    | 109 | 376.50 | 370.00 | 4.50   | 4.25   | 7.50   | 14.25  | 96.91 | 95.24 | 66.50  | 122.50 | 211.75 | 181.25 | 85.25  | 117.75 | 79.50  | 71.00  | 297.00 | 299.00 |
| MDD    | 110 | 314.25 | 355.25 | 32.00  | 17.50  | 42.25  | 15.75  | 80.89 | 91.44 | 89.75  | 134.50 | 206.75 | 180.00 | 38.50  | 93.25  | 69.00  | 82.00  | 245.25 | 273.25 |
| MDD    | 111 | 223.25 | 307.25 | 72.25  | 33.25  | 93.00  | 48.00  | 57.46 | 79.09 | NaN    | 134.50 | 148.50 | 199.25 | 37.25  | 69.25  | 37.50  | 38.75  | 185.75 | 268.50 |
| MDD    | 112 | 342.00 | 364.25 | 5.00   | 7.00   | 41.50  | 17.25  | 88.03 | 93.76 | 105.00 | 69.75  | 203.25 | 282.75 | 79.00  | 20.50  | 59.75  | 61.00  | 282.25 | 303.25 |
| MDD    | 113 | 366.00 | 326.50 | 14.00  | 29.75  | 8.50   | 32.25  | 94.21 | 84.04 | 90.75  | 73.75  | 148.25 | 134.25 | 119.50 | 120.00 | 98.25  | 72.25  | 267.75 | 254.25 |
| MDD    | 114 | 332.50 | 328.00 | 14.00  | 31.00  | 42.00  | 29.50  | 85.59 | 84.43 | 50.00  | 37.50  | 175.00 | 209.50 | 49.00  | 44.50  | 108.50 | 74.00  | 224.00 | 254.00 |
| MDD    | 115 | 150.50 | 155.25 | 183.25 | 218.50 | 54.75  | 14.75  | 38.74 | 39.96 | 66.25  | NaN    | 40.75  | 87.25  | 17.75  | 25.50  | 92.00  | 42.50  | 58.50  | 112.75 |
| MDD    | 116 | 317.25 | 267.00 | 31.50  | 66.00  | 39.75  | 55.50  | 81.66 | 68.73 | 76.25  | 137.00 | 146.25 | 144.75 | 58.00  | 43.75  | 113.00 | 78.50  | 204.25 | 188.50 |
| MDD    | 117 | 145.00 | 151.00 | 226.00 | 229.75 | 17.50  | 7.75   | 37.32 | 38.87 | 75.75  | 71.00  | 85.00  | 102.50 | 45.75  | 35.50  | 14.25  | 13.00  | 130.75 | 138.00 |
| MDD    | 118 | 241.50 | 239.50 | 115.00 | 132.00 | 32.00  | 17.00  | 62.16 | 61.65 | NaN    | 67.00  | 190.00 | 132.50 | 51.50  | 46.50  | 0.00   | 60.50  | 241.50 | 179.00 |
| MDD    | 119 | 346.00 | 354.50 | 25.50  | 7.50   | 17.00  | 26.50  | 89.06 | 91.25 | NaN    | 122.00 | 320.50 | 227.50 | 25.50  | 73.00  | 0.00   | 54.00  | 346.00 | 300.50 |
| MDD    | 120 | 298.25 | 343.25 | 11.75  | 24.75  | 78.50  | 20.50  | 76.77 | 88.35 | 78.00  | 65.50  | 158.25 | 169.00 | 73.00  | 103.50 | 67.00  | 70.75  | 231.25 | 272.50 |
| MDD    | 121 | 106.00 | 129.50 | 99.00  | 122.50 | 183.50 | 136.50 | 27.28 | 33.33 | 231.00 | 217.00 | 81.00  | 91.00  | 2.00   | 25.50  | 23.00  | 13.00  | 83.00  | 116.50 |
| MDD    | 122 | 256.50 | 276.25 | 100.75 | 102.75 | 31.25  | 9.50   | 66.02 | 71.11 | 38.75  | 60.00  | 106.75 | 186.50 | 48.25  | 39.00  | 101.50 | 50.75  | 155.00 | 225.50 |
| MDD    | 123 | 358.50 | 365.50 | 12.50  | 14.00  | 17.50  | 9.00   | 92.28 | 94.08 | 99.50  | 96.50  | 231.50 | 228.50 | 44.00  | 60.00  | 83.00  | 77.00  | 275.50 | 288.50 |
| MDD    | 124 | 290.50 | 312.25 | 48.00  | 36.75  | 50.00  | 39.50  | 74.77 | 80.37 | 105.00 | 160.25 | 196.25 | 139.25 | 60.00  | 134.50 | 34.25  | 38.50  | 256.25 | 273.75 |
| Health | 1   | 310.50 | 322.00 | 19.75  | 14.25  | 58.25  | 52.25  | 79.92 | 82.88 | 91.75  | 181.75 | 163.00 | 176.25 | 64.25  | 71.00  | 83.25  | 74.75  | 227.25 | 247.25 |
| Health | 2   | 315.25 | 356.25 | 51.50  | 20.25  | 21.75  | 12.00  | 81.15 | 91.70 | 57.25  | 84.25  | 175.50 | 154.50 | 65.50  | 105.25 | 74.25  | 96.50  | 241.00 | 259.75 |
| Health | 3   | 378.00 | 368.50 | 3.50   | 2.50   | 7.00   | 17.50  | 97.30 | 94.85 | 59.00  | 57.50  | 145.00 | 141.00 | 152.50 | 110.00 | 80.50  | 117.50 | 297.50 | 251.00 |
| Health | 4   | 379.00 | 364.00 | 5.00   | 9.75   | 4.50   | 14.75  | 97.55 | 93.69 | 60.75  | 50.25  | 186.75 | 179.50 | 145.50 | 108.00 | 46.75  | 76.50  | 332.25 | 287.50 |
| Health | 5   | 325.25 | 301.75 | 32.25  | 33.50  | 31.00  | 53.25  | 83.72 | 77.67 | 125.00 | 123.75 | 181.75 | 165.00 | 107.75 | 82.00  | 35.75  | 54.75  | 289.50 | 247.00 |
| Health | 6   | 355.00 | 351.25 | 13.75  | 13.50  | 19.75  | 23.75  | 91.38 | 90.41 | 54.00  | 55.75  | 197.00 | 187.75 | 75.00  | 91.25  | 83.00  | 72.25  | 272.00 | 279.00 |

|        |    |        |        |       |        |        |        |       |       |        |        |        |        |        |        |       |        |        |        |
|--------|----|--------|--------|-------|--------|--------|--------|-------|-------|--------|--------|--------|--------|--------|--------|-------|--------|--------|--------|
| Health | 7  | 375.25 | 378.00 | 4.50  | 2.75   | 8.75   | 7.75   | 96.59 | 97.30 | 240.00 | 62.00  | 179.25 | 204.25 | 181.25 | 106.75 | 14.75 | 67.00  | 360.50 | 311.00 |
| Health | 8  | 376.00 | 352.00 | 3.00  | 1.00   | 9.50   | 35.50  | 96.78 | 90.60 | 84.50  | 76.50  | 103.00 | 127.50 | 210.00 | 153.50 | 63.00 | 71.00  | 313.00 | 281.00 |
| Health | 9  | 363.25 | 343.00 | 5.25  | 14.50  | 20.00  | 31.00  | 93.50 | 88.29 | 66.50  | 56.25  | 127.50 | 182.75 | 167.50 | 77.75  | 68.25 | 82.50  | 295.00 | 260.50 |
| Health | 10 | 349.25 | 337.25 | 16.00 | 17.75  | 23.25  | 33.50  | 89.90 | 86.81 | 82.00  | 77.75  | 98.50  | 187.00 | 215.25 | 74.00  | 35.50 | 76.25  | 313.75 | 261.00 |
| Health | 11 | 338.50 | 337.50 | 8.50  | 6.25   | 41.50  | 44.75  | 87.13 | 86.87 | 39.75  | 64.50  | 191.50 | 206.25 | 74.00  | 68.25  | 73.00 | 63.00  | 265.50 | 274.50 |
| Health | 12 | 324.50 | 315.50 | 10.75 | 8.75   | 53.25  | 64.25  | 83.53 | 81.21 | 108.00 | 109.00 | 185.00 | 180.75 | 94.50  | 69.75  | 45.00 | 65.00  | 279.50 | 250.50 |
| Health | 13 | 354.00 | 337.75 | 6.25  | 12.25  | 28.25  | 38.50  | 91.12 | 86.94 | 92.00  | 85.25  | 209.75 | 160.25 | 74.75  | 93.75  | 69.50 | 83.75  | 284.50 | 254.00 |
| Health | 14 | 379.25 | 373.75 | 3.50  | 5.00   | 5.75   | 9.75   | 97.62 | 96.20 | 81.75  | 75.50  | 123.00 | 171.50 | 212.50 | 120.25 | 43.75 | 82.00  | 335.50 | 291.75 |
| Health | 15 | 351.75 | 344.13 | 3.38  | 3.25   | 33.38  | 41.13  | 90.54 | 88.58 | 39.50  | 40.88  | 247.13 | 160.50 | 23.75  | 100.00 | 80.88 | 83.63  | 270.88 | 260.50 |
| Health | 16 | 338.50 | 297.00 | 8.20  | 7.90   | 41.80  | 83.60  | 87.13 | 76.45 | 72.10  | 71.90  | 181.80 | 126.50 | 78.70  | 101.20 | 78.00 | 69.30  | 260.50 | 227.70 |
| Health | 17 | 366.50 | 363.10 | 7.90  | 7.80   | 14.10  | 17.60  | 94.34 | 93.46 | 106.10 | 107.70 | 226.50 | 164.40 | 80.10  | 132.20 | 59.90 | 66.50  | 306.60 | 296.60 |
| Health | 18 | 366.17 | 368.00 | 6.50  | 5.67   | 15.83  | 14.83  | 94.25 | 94.72 | 74.67  | 72.33  | 199.00 | 186.50 | 74.67  | 89.33  | 92.50 | 92.17  | 273.67 | 275.83 |
| Health | 19 | 362.50 | 347.60 | 12.30 | 23.40  | 13.70  | 17.50  | 93.31 | 89.47 | 69.30  | 80.70  | 221.80 | 193.90 | 68.40  | 80.30  | 72.30 | 73.40  | 290.20 | 274.20 |
| Health | 20 | 360.80 | 344.30 | 14.80 | 18.50  | 12.90  | 25.70  | 92.87 | 88.62 | 62.70  | 79.00  | 198.20 | 174.60 | 76.50  | 99.20  | 86.10 | 70.50  | 274.70 | 273.80 |
| Health | 21 | 363.50 | 366.00 | 10.40 | 8.30   | 14.60  | 14.20  | 93.56 | 94.21 | 49.90  | 61.30  | 219.10 | 201.30 | 63.60  | 82.60  | 80.80 | 82.10  | 282.70 | 283.90 |
| Health | 22 | 341.60 | 334.80 | 5.20  | 8.10   | 41.70  | 45.60  | 87.93 | 86.18 | 78.20  | 92.90  | 206.60 | 193.30 | 64.00  | 70.40  | 71.00 | 71.10  | 270.60 | 263.70 |
| Health | 23 | 381.50 | 379.50 | 5.50  | 2.50   | 1.50   | 6.50   | 98.20 | 97.68 | 53.00  | 56.50  | 235.50 | 220.50 | 66.00  | 84.50  | 80.00 | 74.50  | 301.50 | 305.00 |
| Health | 24 | 368.20 | 363.60 | 11.00 | 13.40  | 9.30   | 11.50  | 94.77 | 93.59 | 59.70  | 68.30  | 216.10 | 162.00 | 57.80  | 96.40  | 94.30 | 105.20 | 273.90 | 258.40 |
| Health | 25 | 338.90 | 343.50 | 14.90 | 17.70  | 34.70  | 27.30  | 87.23 | 88.42 | 127.70 | 123.20 | 251.70 | 219.30 | 25.00  | 72.00  | 62.20 | 52.20  | 276.70 | 291.30 |
| Health | 26 | 366.70 | 347.90 | 13.30 | 8.80   | 8.50   | 31.80  | 94.39 | 89.55 | 63.90  | 87.40  | 189.90 | 183.20 | 93.80  | 93.10  | 83.00 | 71.60  | 283.70 | 276.30 |
| OSA    | 1  | 247.50 | 148.25 | 13.50 | 43.25  | 127.50 | 197.00 | 63.71 | 38.16 | 185.25 | 238.75 | 196.25 | 103.25 | 22.75  | 7.75   | 28.50 | 37.25  | 219.00 | 111.00 |
| OSA    | 2  | 356.00 | 343.50 | 7.00  | 15.50  | 25.50  | 29.50  | 91.63 | 88.42 | 51.00  | 41.00  | 169.00 | 176.00 | 117.00 | 86.00  | 70.00 | 81.50  | 286.00 | 262.00 |
| OSA    | 3  | 252.50 | 240.50 | 70.00 | 68.00  | 66.00  | 80.00  | 64.99 | 61.90 | 165.50 | 161.00 | 174.50 | 115.00 | 35.00  | 91.50  | 43.00 | 34.00  | 209.50 | 206.50 |
| OSA    | 4  | 342.50 | 340.50 | 23.00 | 22.50  | 23.00  | 25.50  | 88.16 | 87.64 | 39.50  | 95.50  | 207.50 | 165.00 | 65.50  | 107.50 | 69.50 | 68.00  | 273.00 | 272.50 |
| OSA    | 5  | 366.50 | 353.50 | 4.50  | 15.50  | 17.50  | 19.50  | 94.34 | 90.99 | 97.50  | 82.50  | 202.00 | 173.50 | 119.50 | 95.00  | 45.00 | 85.00  | 321.50 | 268.50 |
| OSA    | 6  | 289.50 | 356.50 | 35.50 | 8.00   | 63.50  | 24.00  | 74.52 | 91.76 | 66.00  | 91.50  | 239.00 | 265.00 | 5.50   | 28.50  | 45.00 | 63.00  | 244.50 | 293.50 |
| OSA    | 7  | 282.50 | 281.50 | 13.50 | 1.50   | 92.50  | 105.50 | 72.72 | 72.46 | 126.00 | 99.50  | 233.00 | 176.00 | 0.00   | 56.00  | 49.50 | 49.50  | 233.00 | 232.00 |
| OSA    | 8  | 216.00 | 247.50 | 35.50 | 25.00  | 137.00 | 116.00 | 55.60 | 63.71 | 63.50  | 75.50  | 125.50 | 119.50 | 49.50  | 72.50  | 41.00 | 55.50  | 175.00 | 192.00 |
| OSA    | 9  | 285.50 | 307.50 | 25.50 | 33.00  | 77.50  | 48.00  | 73.49 | 79.15 | 141.00 | 129.50 | 183.00 | 130.00 | 42.50  | 102.00 | 60.00 | 75.50  | 225.50 | 232.00 |
| OSA    | 10 | 313.00 | 330.50 | 17.50 | 9.50   | 58.00  | 48.50  | 80.57 | 85.07 | 189.00 | 54.50  | 237.50 | 179.00 | 33.00  | 61.50  | 42.50 | 90.00  | 270.50 | 240.50 |
| OSA    | 11 | 341.00 | 322.00 | 9.50  | 9.00   | 38.00  | 57.50  | 87.77 | 82.88 | 53.50  | 49.50  | 158.50 | 142.00 | 102.50 | 112.50 | 80.00 | 67.50  | 261.00 | 254.50 |
| OSA    | 12 | 330.50 | 214.00 | 19.50 | 144.50 | 38.50  | 30.00  | 85.07 | 55.08 | 17.50  | 51.50  | 63.50  | 100.00 | 219.00 | 67.00  | 48.00 | 47.00  | 282.50 | 167.00 |
| OSA    | 13 | 372.00 | 354.50 | 2.50  | 9.50   | 14.00  | 24.50  | 95.75 | 91.25 | 135.00 | 130.00 | 282.50 | 216.00 | 9.50   | 89.00  | 80.00 | 49.50  | 292.00 | 305.00 |

|     |    |        |        |        |       |        |        |       |       |        |        |        |        |        |       |       |       |        |        |
|-----|----|--------|--------|--------|-------|--------|--------|-------|-------|--------|--------|--------|--------|--------|-------|-------|-------|--------|--------|
| OSA | 14 | 328.75 | 332.00 | 19.25  | 12.00 | 40.50  | 44.50  | 84.62 | 85.46 | 109.50 | 57.50  | 167.50 | 163.75 | 119.50 | 88.75 | 41.75 | 79.50 | 287.00 | 252.50 |
| OSA | 15 | 337.00 | 348.50 | 28.00  | 26.50 | 23.50  | 13.50  | 86.74 | 89.70 | 128.50 | 51.50  | 206.00 | 198.00 | 79.00  | 83.50 | 52.00 | 67.00 | 285.00 | 281.50 |
| OSA | 16 | 266.00 | 310.50 | 93.00  | 32.00 | 29.50  | 46.00  | 68.47 | 79.92 | 67.00  | 49.50  | 169.50 | 187.50 | 67.00  | 64.00 | 29.50 | 59.00 | 236.50 | 251.50 |
| OSA | 17 | 290.00 | 325.50 | 83.00  | 11.50 | 15.50  | 51.50  | 74.65 | 83.78 | 64.50  | 46.00  | 174.00 | 226.50 | 70.00  | 45.50 | 46.00 | 53.50 | 244.00 | 272.00 |
| OSA | 18 | 360.50 | 348.50 | 3.00   | 10.50 | 25.00  | 29.50  | 92.79 | 89.70 | 86.50  | 77.00  | 223.00 | 182.00 | 64.00  | 88.00 | 73.50 | 78.50 | 287.00 | 270.00 |
| OSA | 19 | 332.50 | 320.50 | 32.50  | 27.00 | 23.50  | 41.00  | 85.59 | 82.50 | 115.00 | 85.50  | 207.50 | 141.00 | 71.00  | 87.50 | 54.00 | 92.00 | 278.50 | 228.50 |
| OSA | 20 | 302.50 | 276.00 | 14.50  | 48.50 | 71.50  | 64.00  | 77.86 | 71.04 | 103.50 | 75.00  | 205.00 | 171.50 | 63.00  | 64.00 | 34.50 | 40.50 | 268.00 | 235.50 |
| OSA | 21 | 161.00 | 329.50 | 151.50 | 15.00 | 76.00  | 44.00  | 41.44 | 84.81 | 89.50  | 216.00 | 158.50 | 232.50 | 0.00   | 69.50 | 2.50  | 27.50 | 158.50 | 302.00 |
| OSA | 22 | 285.50 | 159.50 | 10.00  | 82.50 | 93.00  | 146.50 | 73.49 | 41.06 | 108.50 | 111.50 | 190.50 | 132.00 | 14.50  | 6.00  | 80.50 | 21.50 | 205.00 | 138.00 |
| OSA | 23 | 252.50 | 243.00 | 11.50  | 13.50 | 124.50 | 132.00 | 64.99 | 62.55 | 89.50  | 159.00 | 135.00 | 215.00 | 74.00  | 0.00  | 43.50 | 28.00 | 209.00 | 215.00 |
| OSA | 24 | 221.50 | 297.50 | 32.00  | 24.00 | 135.00 | 67.00  | 57.01 | 76.58 | 256.00 | 145.00 | 173.50 | 184.50 | 25.50  | 84.50 | 22.50 | 28.50 | 199.00 | 269.00 |
| OSA | 25 | 200.50 | 278.00 | 13.00  | 20.50 | 175.00 | 90.00  | 51.61 | 71.56 | 291.00 | 293.50 | 197.00 | 199.50 | 0.00   | 42.00 | 3.50  | 36.50 | 197.00 | 241.50 |
| OSA | 26 | 344.00 | 345.50 | 17.00  | 9.00  | 27.50  | 34.00  | 88.55 | 88.93 | 50.50  | 190.00 | 229.50 | 246.50 | 56.00  | 69.00 | 58.50 | 30.00 | 285.50 | 315.50 |
| OSA | 27 | 287.50 | 339.00 | 4.00   | 0.50  | 97.00  | 49.00  | 74.00 | 87.26 | 64.50  | 53.00  | 238.50 | 248.50 | 16.50  | 48.00 | 32.50 | 42.50 | 255.00 | 296.50 |
| OSA | 28 | 293.50 | 265.00 | 15.50  | 86.50 | 79.50  | 37.00  | 75.55 | 68.21 | 138.50 | 54.50  | 241.00 | 149.00 | 31.00  | 34.00 | 21.50 | 82.00 | 272.00 | 183.00 |

### Legend

Patho: Pathlogy groups

INS: Insomnia

MDD: Major depressive disorder

OSA: Obstructive sleep apnea

Subj: Subjects ID

PSG: Polysomnography

SA: Somno-Art Software

#### Sleep parameters:

TST: total sleep time

SE: Sleep efficiency

SL: Sleep latency

WASO: Wake after sleep onset

REML: REM sleep latency

N1N2: N1+N2 sleep

N3: N3 sleep

REM: REM sleep

NREM: NREM sleep
